# Supplementary material for: Close Association between Awareness of Teeth-Alignment Disorder and Systemic Disorders in Late Adolescence
Source: PubMed Central journal article supplement (PMC8066092; doi:10.3390/healthcare9040370), 2021-03-26
Supplement: healthcare-09-00370-s001.pdf [file healthcare-09-00370-s001.pdf]

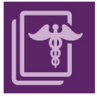

Table S1. Awareness of Teeth-Alignment Disorder.

|                                                                                    |                          |                          |
|------------------------------------------------------------------------------------|--------------------------|--------------------------|
| "Are you concerned about alignment of your teeth (appearance of teeth alignment)?" | Yes                      | No                       |
|                                                                                    | <input type="checkbox"/> | <input type="checkbox"/> |

Medical History

Please choose the presence or absence of the following disease(s)/disorder(s). When you chose the presence of a history for diseases/disorders, please write the specific name(s) of the disease(s)/disorder(s).

|    |                                                          | Presence                 | Absence                  | Name of disease(s)/disorder(s) |
|----|----------------------------------------------------------|--------------------------|--------------------------|--------------------------------|
| 1  | Neuromasucular disease                                   | <input type="checkbox"/> | <input type="checkbox"/> |                                |
| 2  | Cerebrovascular disease                                  | <input type="checkbox"/> | <input type="checkbox"/> |                                |
| 3  | Coronary artery disease                                  | <input type="checkbox"/> | <input type="checkbox"/> |                                |
| 4  | The other vascular disease                               | <input type="checkbox"/> | <input type="checkbox"/> |                                |
| 5  | Heart disease, arrhythmia, or abnormal electrocardiogram | <input type="checkbox"/> | <input type="checkbox"/> |                                |
| 6  | Hypertention                                             | <input type="checkbox"/> | <input type="checkbox"/> |                                |
| 7  | Respiratory disease                                      | <input type="checkbox"/> | <input type="checkbox"/> |                                |
| 8  | Esophagus, gastrointestinal disease                      | <input type="checkbox"/> | <input type="checkbox"/> |                                |
| 9  | Liver, gall bladder, pancreatic disease                  | <input type="checkbox"/> | <input type="checkbox"/> |                                |
| 10 | Renal disease                                            | <input type="checkbox"/> | <input type="checkbox"/> |                                |
| 11 | Hyperuricemia, gout                                      | <input type="checkbox"/> | <input type="checkbox"/> |                                |
| 12 | Diabetes mellitus                                        | <input type="checkbox"/> | <input type="checkbox"/> |                                |
| 13 | Dyslipidemia                                             | <input type="checkbox"/> | <input type="checkbox"/> |                                |
| 14 | Thyroid disease                                          | <input type="checkbox"/> | <input type="checkbox"/> |                                |
| 15 | Endocrine disease                                        | <input type="checkbox"/> | <input type="checkbox"/> |                                |
| 16 | Collagen disease                                         | <input type="checkbox"/> | <input type="checkbox"/> |                                |
| 17 | Blood disease                                            | <input type="checkbox"/> | <input type="checkbox"/> |                                |
| 18 | Malignant neoplasm                                       | <input type="checkbox"/> | <input type="checkbox"/> |                                |
| 19 | Allergic disease                                         | <input type="checkbox"/> | <input type="checkbox"/> |                                |
| 20 | Eye disease                                              | <input type="checkbox"/> | <input type="checkbox"/> |                                |
| 21 | Otorhinolaryngologic disease                             | <input type="checkbox"/> | <input type="checkbox"/> |                                |
| 22 | Skin disease                                             | <input type="checkbox"/> | <input type="checkbox"/> |                                |
| 23 | Bone, joint, muscle diseases                             | <input type="checkbox"/> | <input type="checkbox"/> |                                |
| 24 | Urologic disease, gynecological disease                  | <input type="checkbox"/> | <input type="checkbox"/> |                                |
| 25 | The other                                                | <input type="checkbox"/> | <input type="checkbox"/> |                                |
